# Supplementary material
Source: Research Square preprint supplement (doi:10.21203/rs.3.rs-8888264/v1)
Supplement: Supplementary file 1 [file 2ce32b3abad1c631f4bcffab.docx]

**Supplementay figure:**

**Supplementary Figure 1:**

**
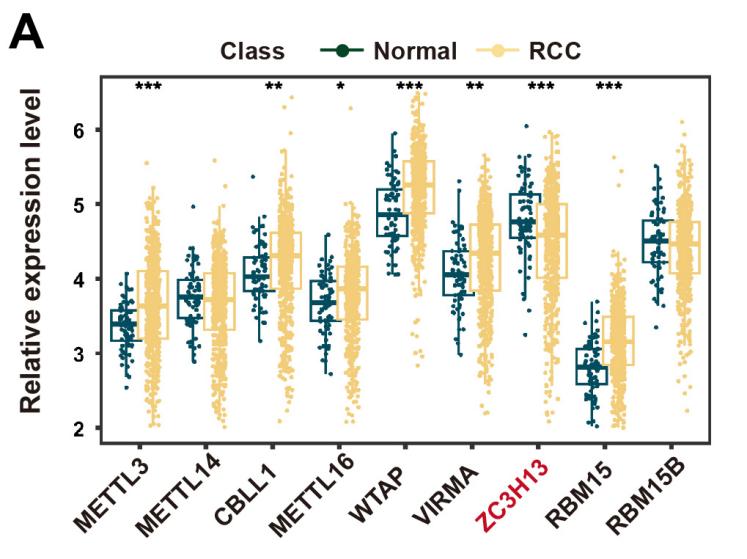
**

**Supplementary Figure 1: Expression profiles of nine m6A methyltransferases ("writers") in RCC and normal samples in TCGA cohort.** ns, not significant, *p < 0.05, **p < 0.01, ***p < 0.001. Analysis of 2-tailed t test [A]).

**Supplementary Figure 2:**

**
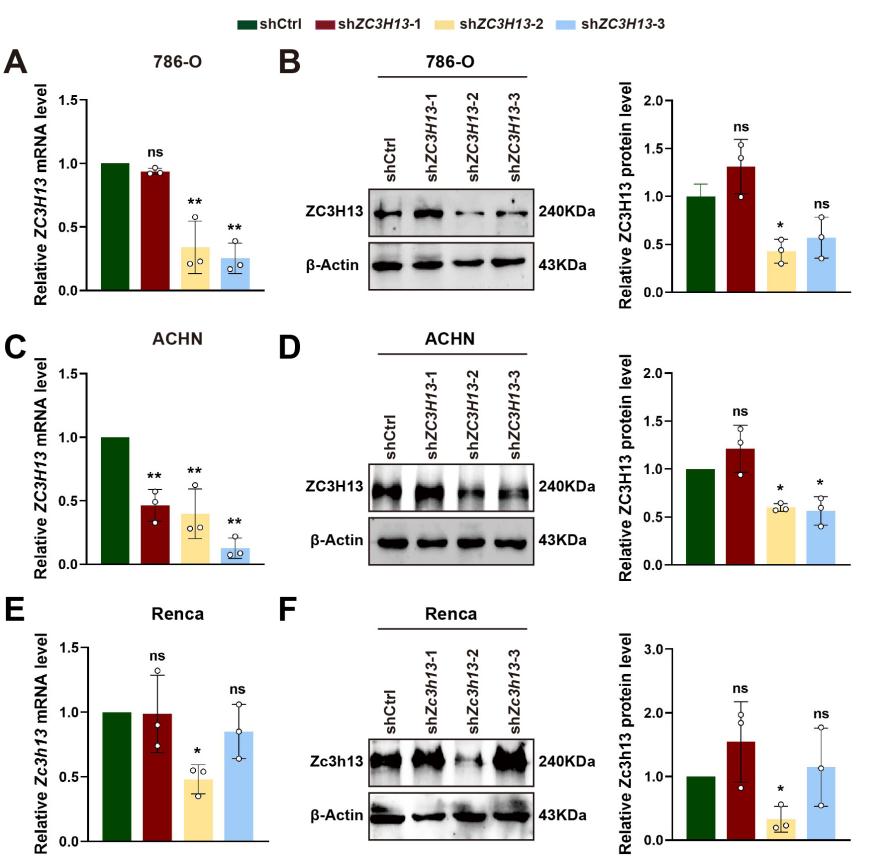
**

**Supplementary Figure 2: Validation of *ZC3H13* knockdown efficiency in renal cell carcinoma cell lines.** (A) Knockdown efficiency of *ZC3H13* was verified by qPCR and western blot in 786-O cells; (B) Knockdown efficiency of *ZC3H13* was verified by qPCR and western blot in ACHN cells; (C) Knockdown efficiency of *ZC3H13* was verified by qPCR and western blot in Renca cells. All histogram chart data are presented as the mean ± SD. Statistical analyses were performed by Graphpad Prism 9.5. n = 3 biological replicates. ns, not significant, *p < 0.05, **p < 0.01. Analysis of one-way ANOVA [A-F].

**Supplementary Figure 3:**

**
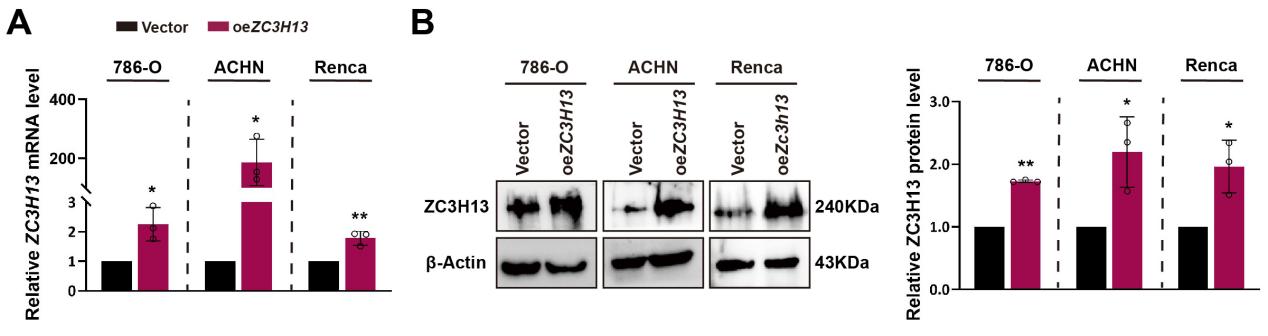
**

**Supplementary Figure 3: Validation of *ZC3H13* overexpression efficiency via qPCR and western blot in renal cell carcinoma cell lines.** All histogram chart data are presented as the mean ± SD. Statistical analyses were performed by Graphpad Prism 9.5. n = 3 biological replicates. ns, not significant, *p < 0.05, **p < 0.01. Analysis of 2-tailed t test [A, B]).

**Supplementary Figure 4:**

**
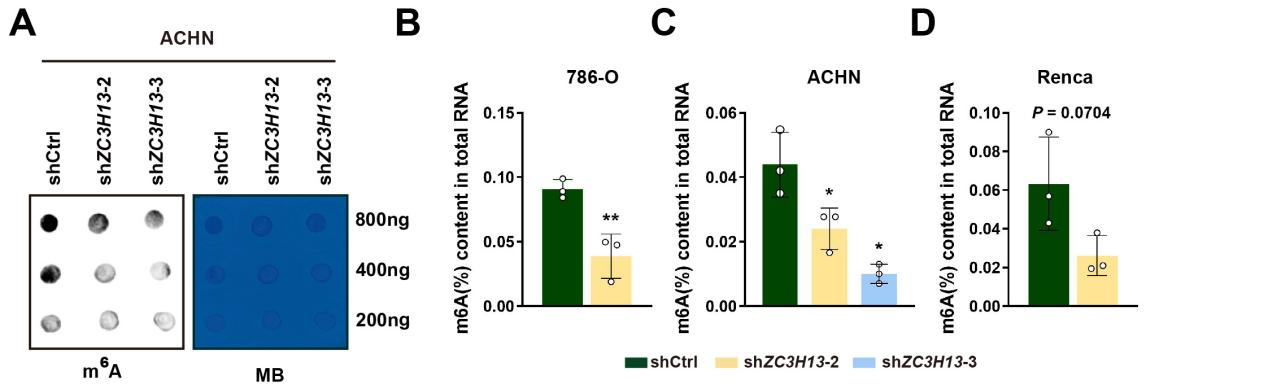
**

**Supplementary Figure 4: Global m6A modification levels are altered by ZC3H13 manipulation.** (A) Effects of *ZC3H13* knockdown on m6A modification levels in ACHN cells, as determined by dot blot analysis. (B-D) Effects of *ZC3H13* knockdown on m6A modification levels in 786-O/ACHN/Renca cells, as measured by ELISA. All histogram chart data are presented as the mean ± SD. Statistical analyses were performed by Graphpad Prism 9.5. n = 3 biological replicates. ns, not significant, *p < 0.05, **p < 0.01. Analysis of one-way ANOVA [C]; 2-tailed t test [B, D]).

**Supplementary Figure 5:**


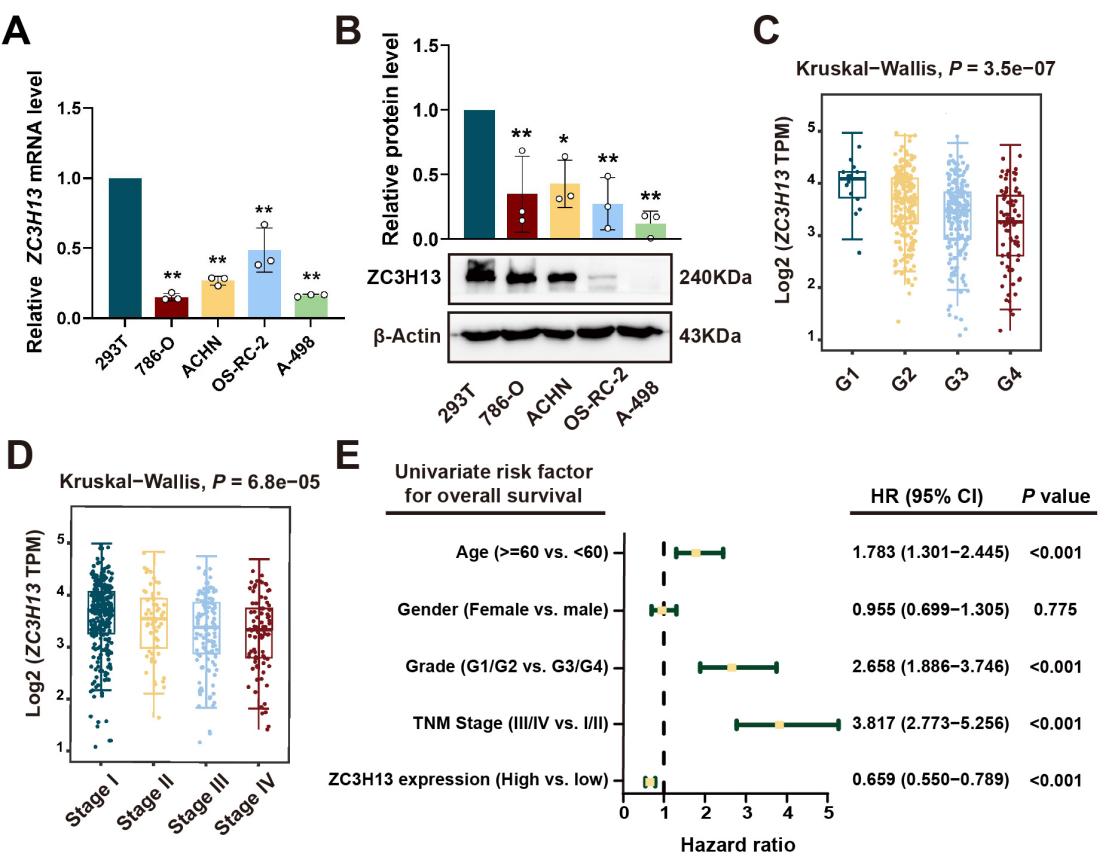


**Supplementary Figure 5: ZC3H13 Expression in Renal Cell Carcinoma Cell Lines and Its Correlation with Pathological Grade, Stage, and Prognosis.** (A-B) ZC3H13 expression in 293T and human RCC cell lines was measured by qPCR and western blot. (C-D) Box plots showing ZC3H13 expression across pathological grades and stages. (E) Univariate analyses were performed in the TCGA-KIRC cohort. All the bars correspond to 95% confidence intervals (CI); HR: hazard rate. All histogram chart data are presented as the mean ± SD. Statistical analyses were performed by Graphpad Prism 9.5. n = 3 biological replicates. ns, not significant, *p < 0.05, **p < 0.01. Analysis of one-way ANOVA [A, B]; Kruskal-Wallis test [C, D], Cox regression [E].

**Supplementary Figure 6:**


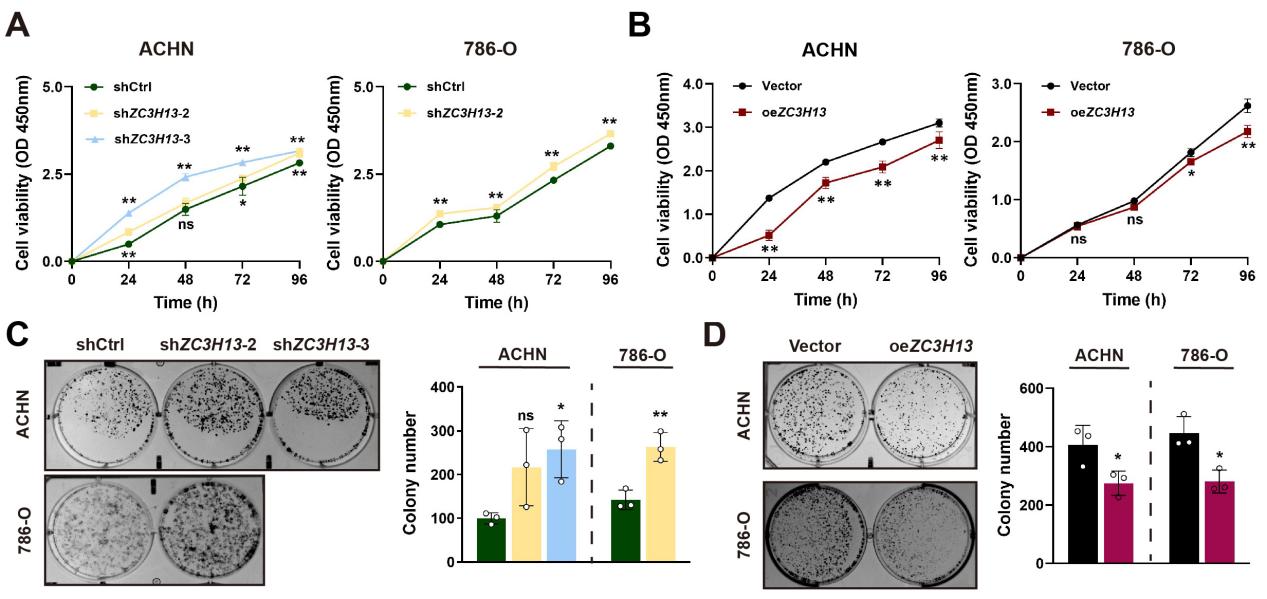


**Supplementary Figure 6. ZC3H13 modulates RCC cell proliferation.** (A, C) Knockdown of *ZC3H13* enhanced cell proliferation as assessed by CCK-8 assay (A) and colony formation assay (C). (B, D) Overexpression of *ZC3H13* attenuated cell proliferation, evaluated by CCK-8 assay (B) and colony formation assay (D). All histogram chart data are presented as the mean ± SD. Statistical analyses were performed by Graphpad Prism 9.5. n = 3 biological replicates. ns, not significant, *p < 0.05, **p < 0.01. Analysis of one-way ANOVA [A, B, C-ACHN], 2-tailed t test [C-786-O, D]).

**Supplementary Figure 7:**

**
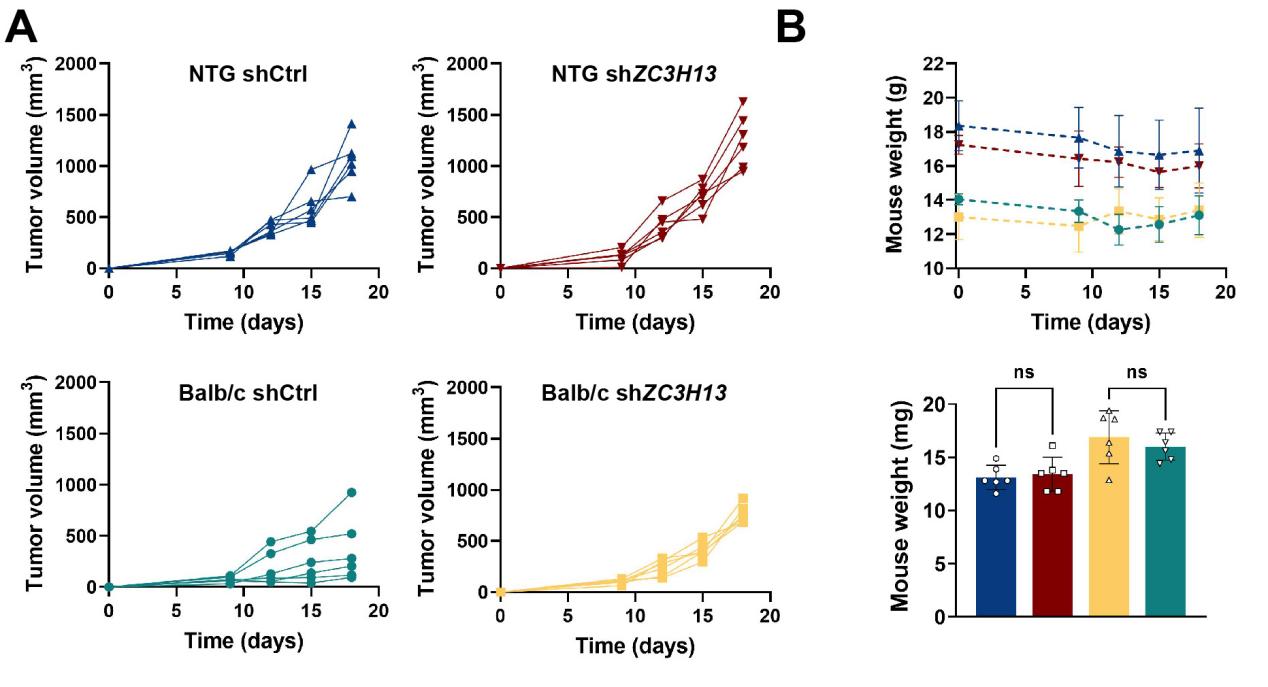
**

(A) Tumor growth curves of the four experimental groups (n=6). (B) Body weights of mice across the four experimental groups. All histogram chart data are presented as the mean ± SD. Statistical analyses were performed by Graphpad Prism 9.5. n = 3 biological replicates. ns, not significant, *p < 0.05, **p < 0.01. Analysis of one-way ANOVA [B].

**Supplementary Figure 8:**


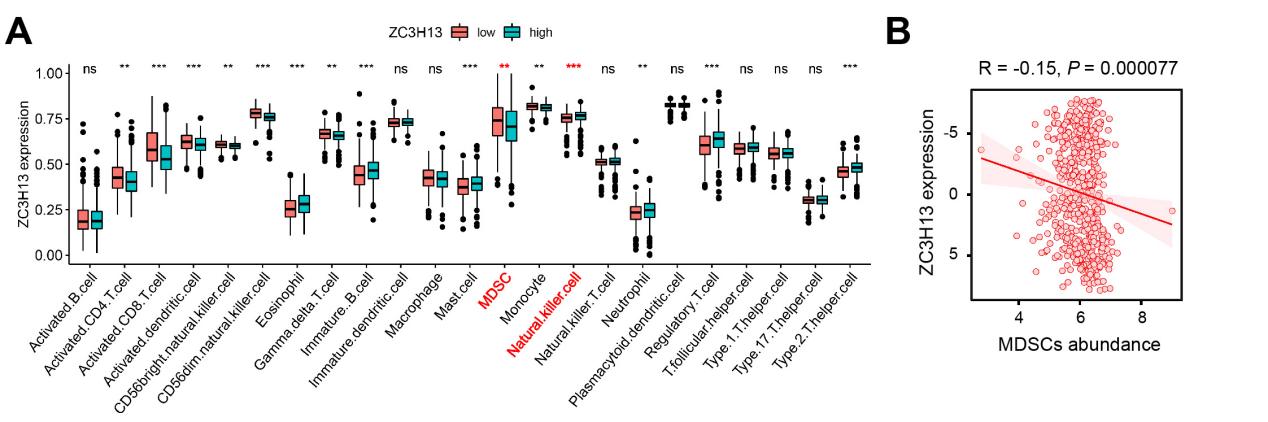
**Supplementary Figure 8: Low ZC3H13 expression group exhibited increased infiltration of MDSCs.** (A) ssGSEA assessing the relationship between ZC3H13 mRNA expression and the infiltration levels of 23 immune cell types in the renal cancer immune microenvironment; (B) Analysis of the correlation between ZC3H13 expression and MDSCs infiltration in renal cell carcinoma using the TSIDB database. ns, not significant, *p < 0.05, **p < 0.01. Analysis of 2-tailed t test [A]), Pearson χ2 test [B]).

**Supplementary Figure 9:**

**
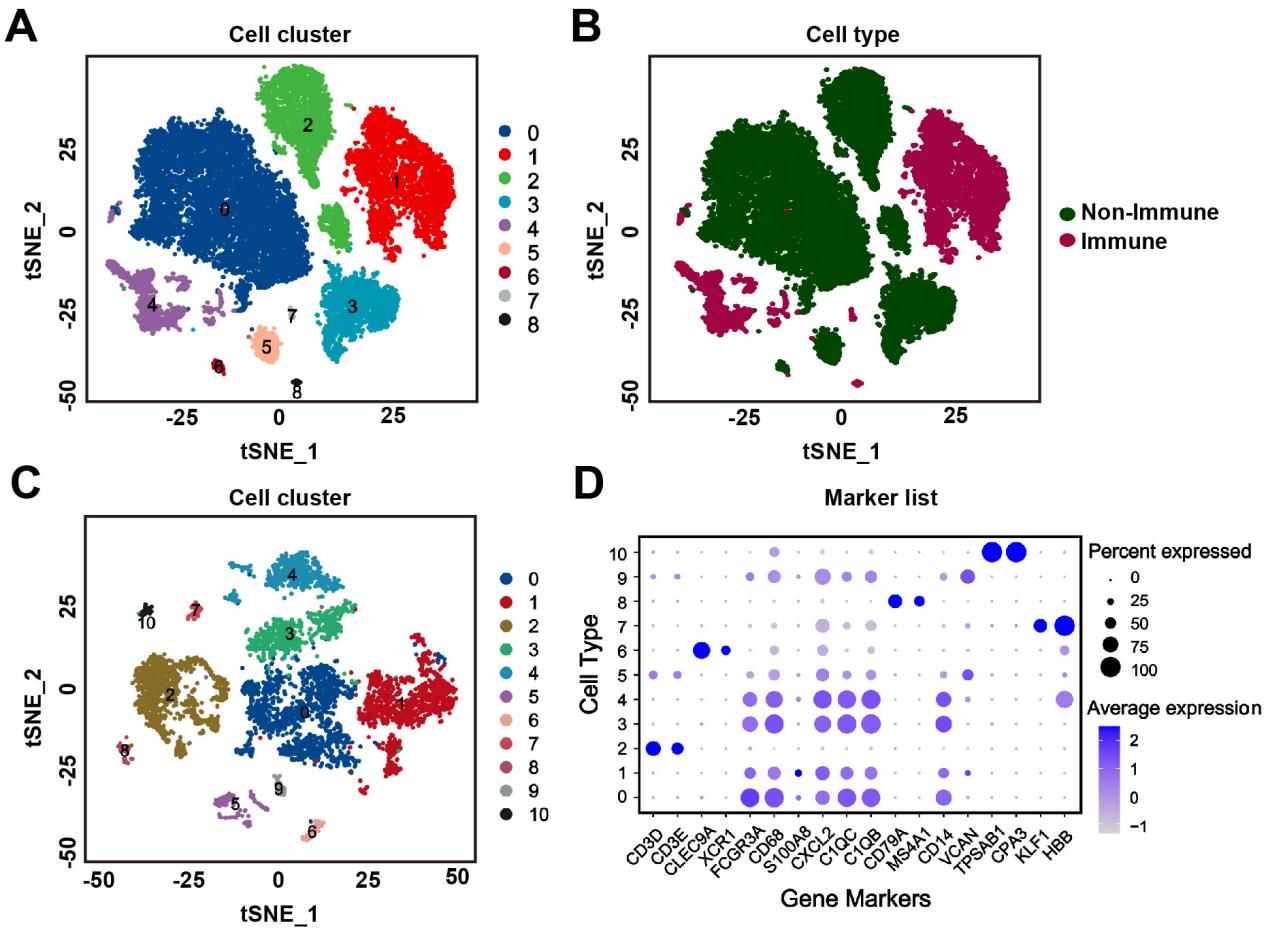
**

**Supplementary Figure 9: . Overview of Single Cells Derived from GSE159115.** (A-B) tSNE plot of all the single cells, with each color coded for (A) 8 major cell types, and (B) immune cell (CD45+ ) or non-immune cell (CD45-). (C) tSNE plot of immune cells, with each color coded for 10 major cell types. (D) Top two marker genes of 10 major cell types identified in this profile.

**Supplementary Figure 10:**


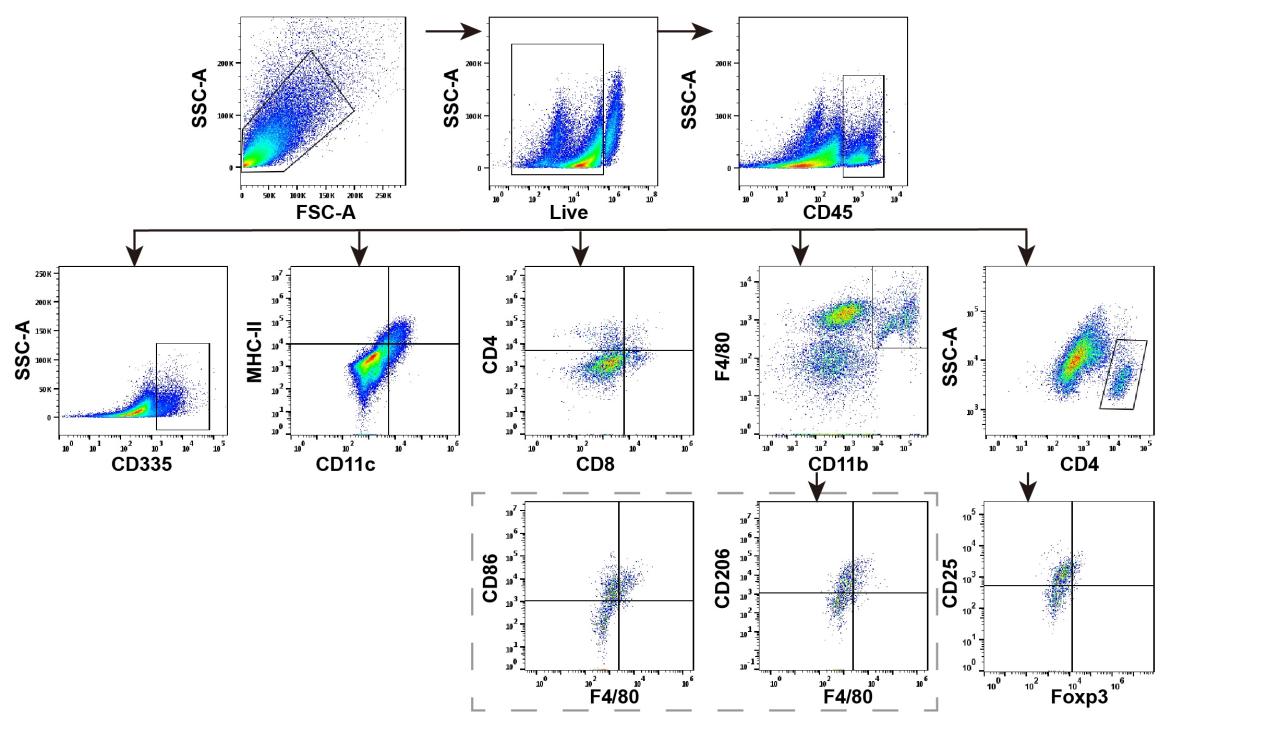


**Supplementary Figure 10: Comprehensive profiling of immune cell infiltration in allograft tumors.** Gating strategy of tumor infiltrating immune cells, including Helper T cell (CD45+CD4+), Cytotoxic T cell (CD45+CD8+), NK cell (CD335+), MDSCs (CD11b+Gr-1+), dendritic cell (CD11c+MHCII+), M1 macrophage (CD11b+F4/80+CD86+) , M2 macrophage (CD11b+F4/80+CD206+) and regulatory T cells (Tregs, CD4+CD25+Foxp3+).

**Supplementary Figure 11:**


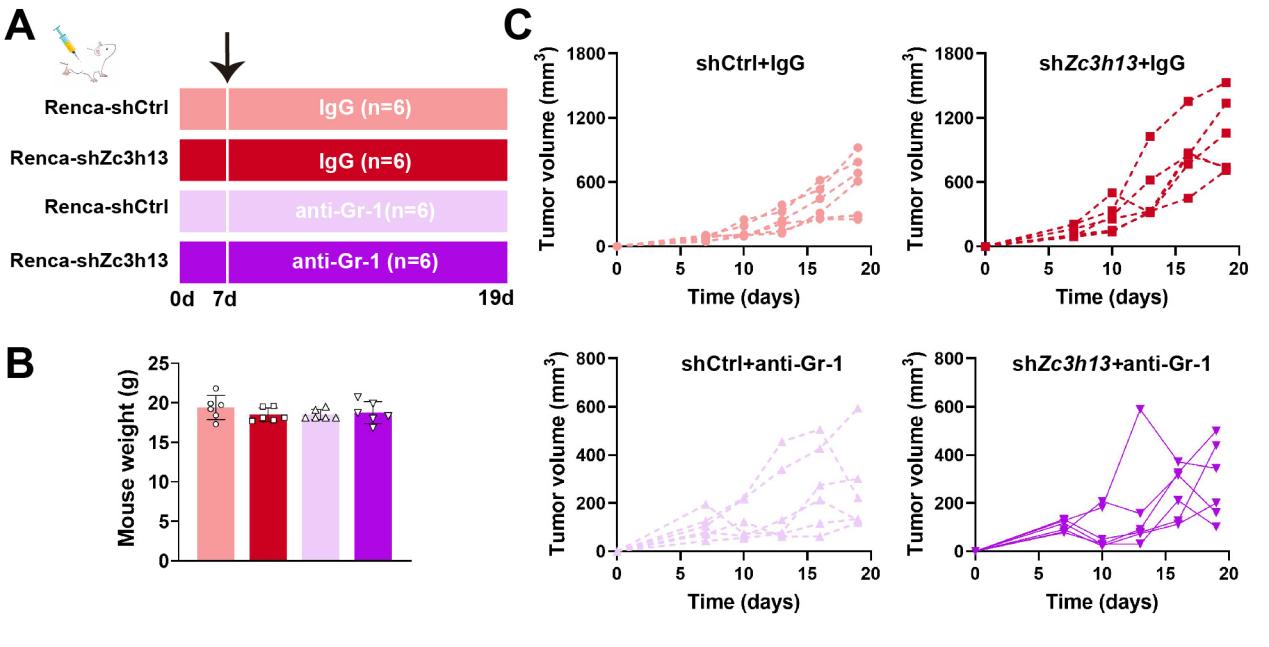


**Supplementary Figure 11:** (A) Schematic model depicting the experimental design of anti-Gr-1 treatment or IgG in Renca-shCtrl and Renca-sh*Zc3h13* allograft-bearing mice. (B) Body weights of mice across the four experimental groups. (C) Tumor growth curves of the four experimental groups.

**Supplementary Figure 12:**


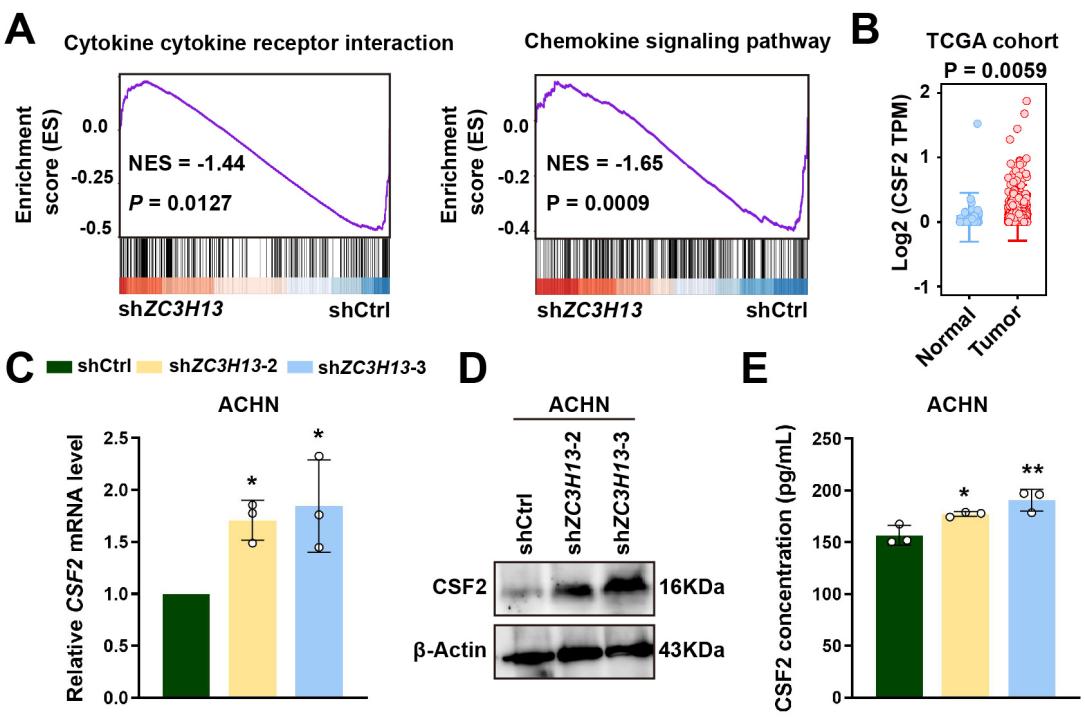


**Supplementary Figure 12: Screening identifies CSF2 as a key cytokine downstream of ZC3H13.** (A) GSEA enrichment plots for cytokine and cytokine receptor pathways and chemokine signaling pathways. (B) Expression profiles of CSF2 in RCC and normal samples of TCGA cohort. (C-D) The mRNA and protein expression levels of CSF2 following *ZC3H13* knockdown in ACHN cells were detected by qPCR and western blot. (E) ELISA analysis of CSF2 secretion in the supernatant of ACHN cells with or without *ZC3H13* knockdown. All histogram chart data are presented as the mean ± SD. Statistical analyses were performed by Graphpad Prism 9.5. n = 3 biological replicates. ns, not significant, *p < 0.05, **p < 0.01. Analysis of ANOVA test [C, E]; 2-tailed t test [B]).

**Supplementary Figure 13:**


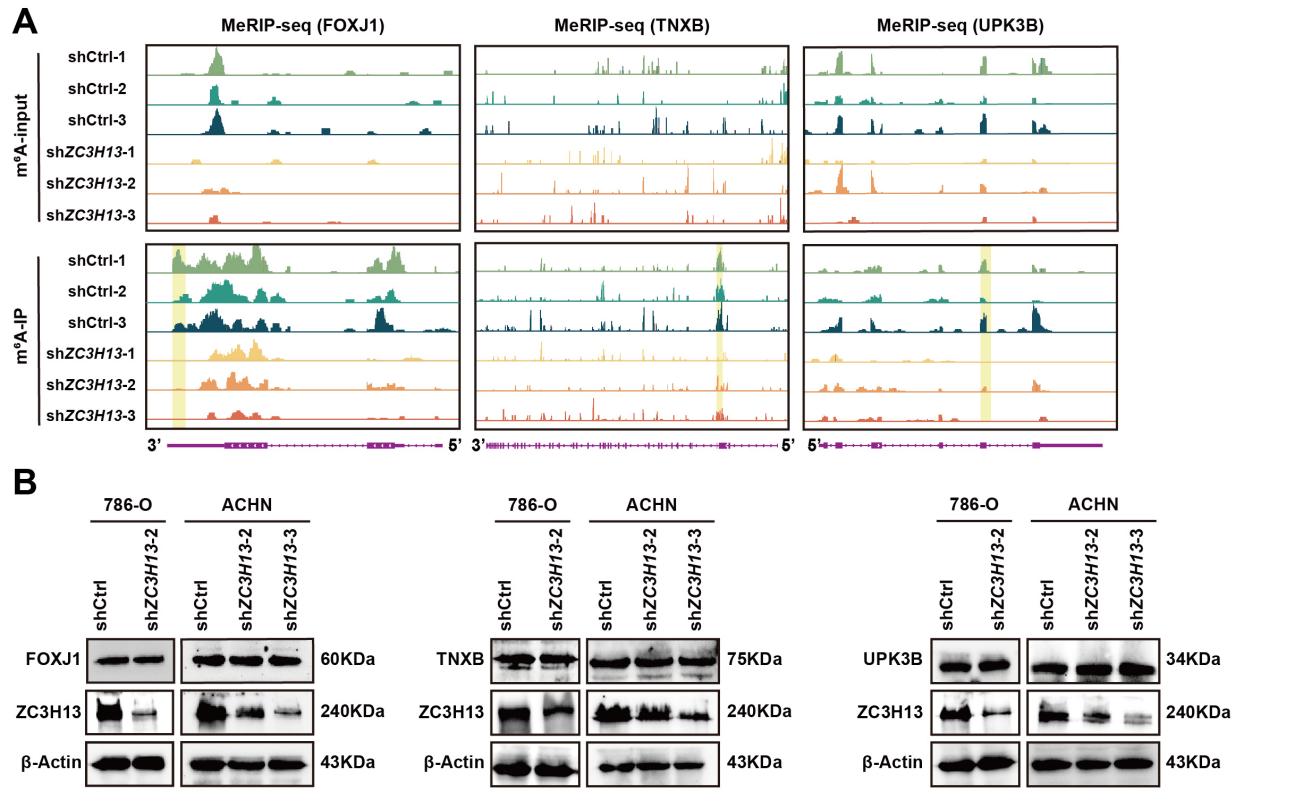


**Supplementary Figure 13: Screening and validation of downstream targets of ZC3H13.** (A) IGV visualization of MeRIP-seq reads along indicated mRNAs. (B) Protein levels of TNXB, UPK3B, and FOXJ1 following *ZC3H13* knockdown in 786-O/ACHN/RenCa cells.

**Supplementary Figure 14:**


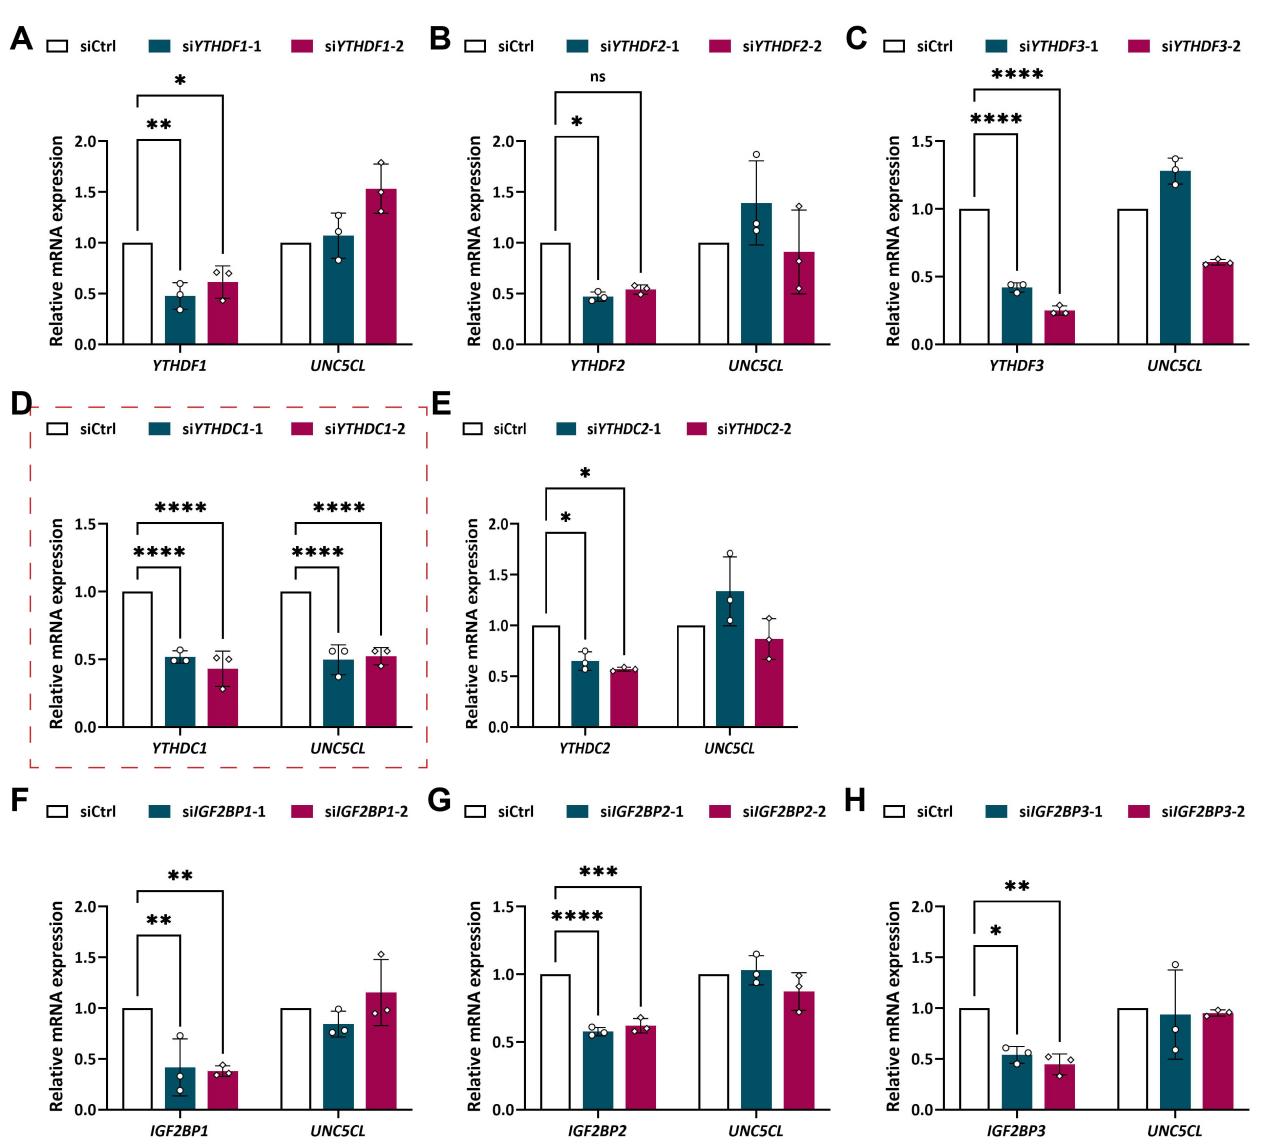


**Supplementary Figure 14: YTHDC1-mediated stabilization of UNC5CL transcripts.** (A-C) Effect of m6A reader (YTHDF1/2/3) silencing on UNC5CL mRNA levels in 786-O cells. (D-E) Effect of m6A reader (YTHDC1/2) silencing on UNC5CL mRNA levels in 786-O cells. (F-H) Effect of m6A reader (IGF2BP1/2/3) silencing on UNC5CL mRNA levels in 786-O cells. All histogram chart data are presented as the mean ± SD. Statistical analyses were performed by Graphpad Prism 9.5. n = 3 biological replicates. ns, not significant, *p < 0.05, **p < 0.01. Analysis of one way ANOVA test [A-H].

**Supplementary Figure 15:**


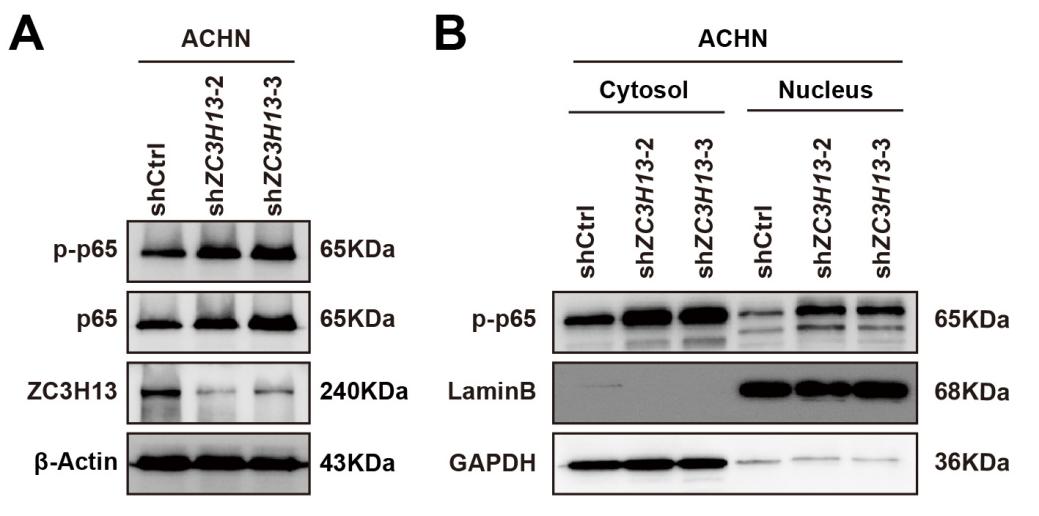


**Supplementary Figure 15: Loss of *ZC3H13* activates the NF-κB-CSF2 signaling axis.** (A) Western blot analysis of p65 and p-p65 expression following *ZC3H13* knockdown in ACHN cells. (B) Nuclear and cytoplasmic fractionation assays were conducted to determine the subcellular distribution of p-p65 after *ZC3H13* knockdown.

**Supplementary tables**

**Table S1. Target sequences of siRNAs or shRNAs**

|  | sense（5'-3'） | antisense（5'-3'） |
| --- | --- | --- |
| si*YTHDF1*-1 | GGCUGGAGAAUAACGACAATT | UUGUCGUUAUUCUCCAGCCTT |
| si*YTHDF1*-2 | GGAUACAGUUCAUGACAAUTT | AUUGUCAUGAACUGUAUCCTT |
| si*YTHDF2*-1 | GGUGGAUGGUAAUGGAGUATT | UACUCCAUUACCAUCCACCTT |
| si*YTHDF2*-2 | GCUCUGGAUAUAGUAGCAATT | UUGCUACUAUAUCCAGAGCTT |
| si*YTHDF3*-1 | CAUACAUCGUUCCAUUAAATT | UUUAAUGGAACGAUGUAUGTT |
| si*YTHDF3*-2 | GUCAGUGCUUCACCUUCUATT | UAGAAGGUGAAGCACUGACTT |
| si*YTHDC1*-1 | GCUCUGCAUCAGAGUCAUATT | UAUGACUCUGAUGCAGAGCTT |
| si*YTHDC1*-2 | GCAAGGAGUGUUAUCUUAATT | UUAAGAUAACACUCCUUGCTT |
| si*YTHDC2*-1 | GGCAGAGAACUGUUCUAAATT | UUUAGAACAGUUCUCUGCCTT |
| si*YTHDC2*-2 | GCAUCCUGUUUGAUGACAATT | UUGUCAUCAAACAGGAUGCTT |
| si*IGF2BP1*-1 | GAGAUGGUGCAGGUGUUUATT | UAAACACCUGCACCAUCUCTT |
| si*IGF2BP1*-2 | CGGUGAACGAGUUGCAGAATT | UUCUGCAACUCGUUCACCGTT |
| si*IGF2BP2*-1 | CAGUUUGAGAACUACUCCUTT | AGGAGUAGUUCUCAAACUGTT |
| si*IGF2BP2*-2 | GUGAAUCUCUUCAUCCCAATT | UUGGGAUGAAGAGAUUCACTT |
| si*IGF2BP3*-1 | GCUGAGAAGUCGAUUACUATT | UAGUAAUCGACUUCUCAGCTT |
| si*IGF2BP3*-2 | GCUAGACAAGCACUAGACATT | UGUCUAGUGCUUGUCUAGCTT |
| sh*ZC3H13*-1 | CCTCACAATCAGGATCATCTA | TAGATGATCCTGATTGTGAGG |
| sh*ZC3H13*-2 | GAAAGTTCTCGTACGGAAATA | TATTTCCGTACGAAGACTTTC |
| sh*ZC3H13*-3 | CCTCTCCTTATCCTTCACATT | AATGTGAAGGATAAGGAGAGG |
| sh*Zc3h13*-1 | GCAGCTGCCTCTATGGAAACACTC | GAGTGTTTCCATAGAGGCAGCTGC |
| sh*Zc3h13*-2 | GATTCTGACAATGGAGATATTCTC | GAGAATATCTCCATTGTCAGAATC |
| sh*Zc3h13*-3 | GCTAGGGATGCTCGGGATATTCTC | GAGAATATCCCGAGCATCCCTAGC |

**Table S2. Primer sequences**

| **Quantitative real-time PCR** | |
| --- | --- |
| *ZC3H13*-F | TCTGATAGCACATCCCGAAGA |
| *ZC3H13*-R | CAGCCAGTTACGGCACTGT |
| *Zc3h13-*F | GATGACCAGGGTAGTCGGAAG |
| *Zc3h13-*R | GGTTCTCCACGCTTTAACTGA |
| *UNC5CL*-F | CGGAGAAAAGCAGCCGATGA |
| *UNC5CL*-R | ATCCTGGAAGGTGTGCATGG |
| *Unc5cl*-F | AAGGCAGCCAATGGGAATGA |
| *Unc5cl* -R | CAGGTCTCTTCCTCCGATGC |
| *CSF2*-F | CTGGAGCTGTACAAGCAGGG |
| *CSF2*-R | CACAGGAAGTTTCCGGGGTT |
| *Csf2*-F | GGGTCTACGGGGCAATTTCA |
| *Csf2*-R | CACAGTCCGTTTCCGGAGTT |
| *GAPDH-*F | AGAAGGCTGGGGCTCATTTG |
| *GAPDH-*R | AGGGGCCATCCACAGTCTTC |
| *Gapdh-*F | AGGTCGGTGTGAACGGATTTG |
| *Gpadh-*R | GGGGTCGTTGATGGCAACA |
| *YTHDF1*-F | TGGACACCCAGAGAACAAAAGG |
| *YTHDF1*-R | CCAATGGACGGCGGGTAATA |
| *YTHDF2*-F | CTGTTGGTAGCGGGTCCATT |
| *YTHDF2*-R | GCCCAAGATGCTGGTTTTGG |
| *YTHDF3*-F | TGTGGGAATTGGGGGTTCTG |
| *YTHDF3*-R | GGAGCCTTTACCACTGACCC |
| *YTHDC1*-F | TATGGTCCACGCTCCCTGTA |
| *YTHDC1*-R | GCTGGAAGCACCCAGTGTAT |
| *YTHDC2*-F | AAAAGAGTCAGGACTGGGGC |
| *YTHDC2*-R | ACGTTCCCATAACTGGAGCA |
| *IGF2BP1*-F | ATCGGCAACCTCAACGAGAG |
| *IGF2BP1*-R | GTTTCGATGGCCTTCATCGC |
| *IGF2BP2*-F | CTACGCCTTCGTGGACTACC |
| *IGF2BP2*-R | TGTTGACTTGTTCCACATTCTCC |
| *IGF2BP3*-F | ACTGCACGGGAAACCCATAG |
| *IGF2BP3*-R | TCCCACTGTAAATGAGGCGG |
| *iNos*-F | GTTCTCAGCCCAACAATACAAGA |
| *iNos*-R | GTGGACGGGTCGATGTCAC |
| *Arg1*-F | CTCCAAGCCAAAGTCCTTAGAG |
| *Arg1*-R | AGGAGCTGTCATTAGGGACATC |
| *PD-L1*-F | GCTCCAAAGGACTTGTACGTG |
| *PD-L1*-R | TGATCTGAAGGGCAGCATTTC |
| *Asns*-F | GCAGTGTCTGAGTGCGATGAA |
| *Asns*-R | TCTTATCGGCTGCATTCCAAAC |
| *IL-10*-F | GCTCTTACTGACTGGCATGAG |
| *IL-10*-R | CGCAGCTCTAGGAGCATGTG |
| **MeRIP-qPCR** | |
| *UNC5CL*-F | TAGTTCTGGATGGCGGAGGC |
| *UNC5CL*-R | TGCTCCTACACCCTTCTCTTCCT |

**Table S3. Antibody list**

| β-Actin | TransGen | HC201-02 |
| --- | --- | --- |
| ZC3H13 | Abcam | ab70802 |
| ZC3H13 | Bioss | bs-18461R |
| UNC5CL | Invitrogen | PA5-30917 |
| UNC5CL | origin | TA337008 |
| p65 | CST | 8242S |
| p-p65 | CST | 3033S |
| GM-CSF | absin | abs124774 |
| CSF2 | absin | abs143539 |
| YTHDC1 | proteintech | 29441-1-AP |
| NCR1 | Affinity | DF7599 |
| GAPDH | Bioworld | AP0066 |
| Lamin B1 | Bioworld | AP6001 |
| N6-Methyladenosine | CST | 56593S |
| CD33 | Abcam | ab270942 |
| FOXJ1 | Immunoway | YT1751 |
| TNXB | FineTest | FNab08596 |
| UPK3B | ABclonal | A22120 |
| CMA1 | HUABIO | ET7107-19 |
| FcR | Invitrogen | 14-0161-82 |
| CD45 | invitrogen | 69-0451-82 |
| CD3 | BioLegend | 100234 |
| CD4 | Invitrogen | 64-0042-82 |
| CD25 | Invitrogen | 17-0251-82 |
| Foxp3 | invitrogen | 12-4774-42 |
| CD8a | Invitrogen | 46-0081-82 |
| Granzyme B | invitrogen | 17-8898-82 |
| CD335 | Invitrogen | 12-3351-82 |
| CD11b | invitrogen | 78-0112-82 |
| F4/80 | Invitrogen | 48-4801-82 |
| CD206 | invitrogen | 12-2061-82 |
| CD86(B7-2) | Invitrogen | 12-0862-82 |
| CD11c | Invitrogen | 17-0114-81 |
| MHCII | Proteintech | AB-65122 |
| Ly6G/Ly6C | Invitrogen | 46-5931-82 |
| Ly6G | invitrogen | 17-9668-82 |
| Fixable Viability Dye eFluor™ 780 | invitrogen | 65-0865-14 |
